# Supplementary material for: A natural allele of OsMS1 responds to temperature changes and confers thermosensitive genic male sterility
Source: PubMed Central journal article supplement (PMC9018702; doi:10.1038/s41467-022-29648-z), 2022-04-19
Supplement: 41467_2022_29648_MOESM2_ESM.pdf [file 41467_2022_29648_MOESM2_ESM.pdf]

1 Description of Additional Supplementary Files

2 File name: Supplementary Data 1

3 Description: Primers used in this study.
